# Supplementary material
Source: Springer Nature journal article supplement (https://www.springermedizin.de/resource/supplementary/12943_2014_1419_MOESM7_ESM.pdf/9552940)

Additional file 7: Figure S6

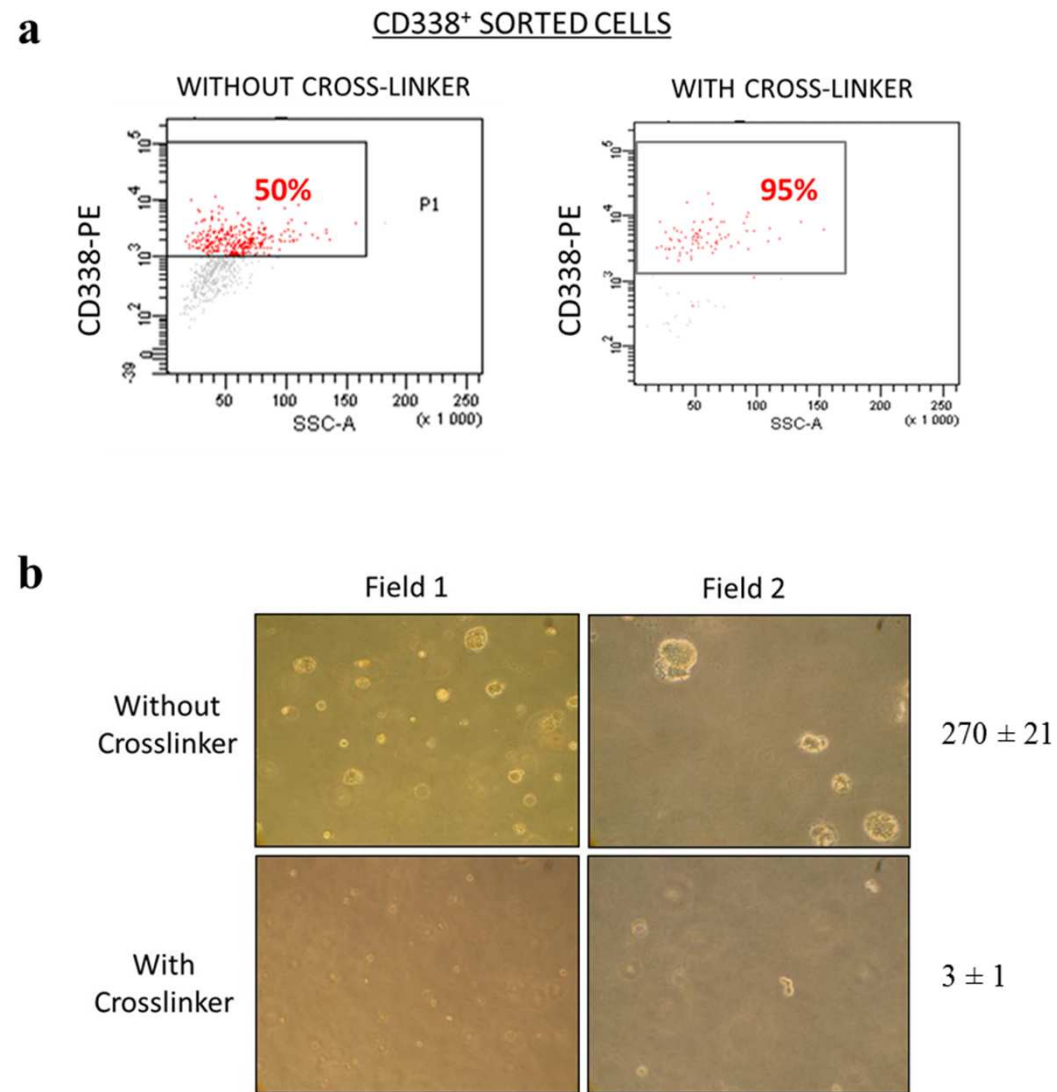

Supplement: MOESM7 [file 9552940]
